# Supplementary material for: A Compensatory U1snRNA Partially Rescues FAH Splicing and Protein Expression in a Splicing-Defective Mouse Model of Tyrosinemia Type I
Source: PubMed Central journal article supplement (PMC7139742; doi:10.3390/ijms21062136), 2020-03-20
Supplement: ijms-21-02136-s001.pdf [file ijms-21-02136-s001.pdf]

Figure S1

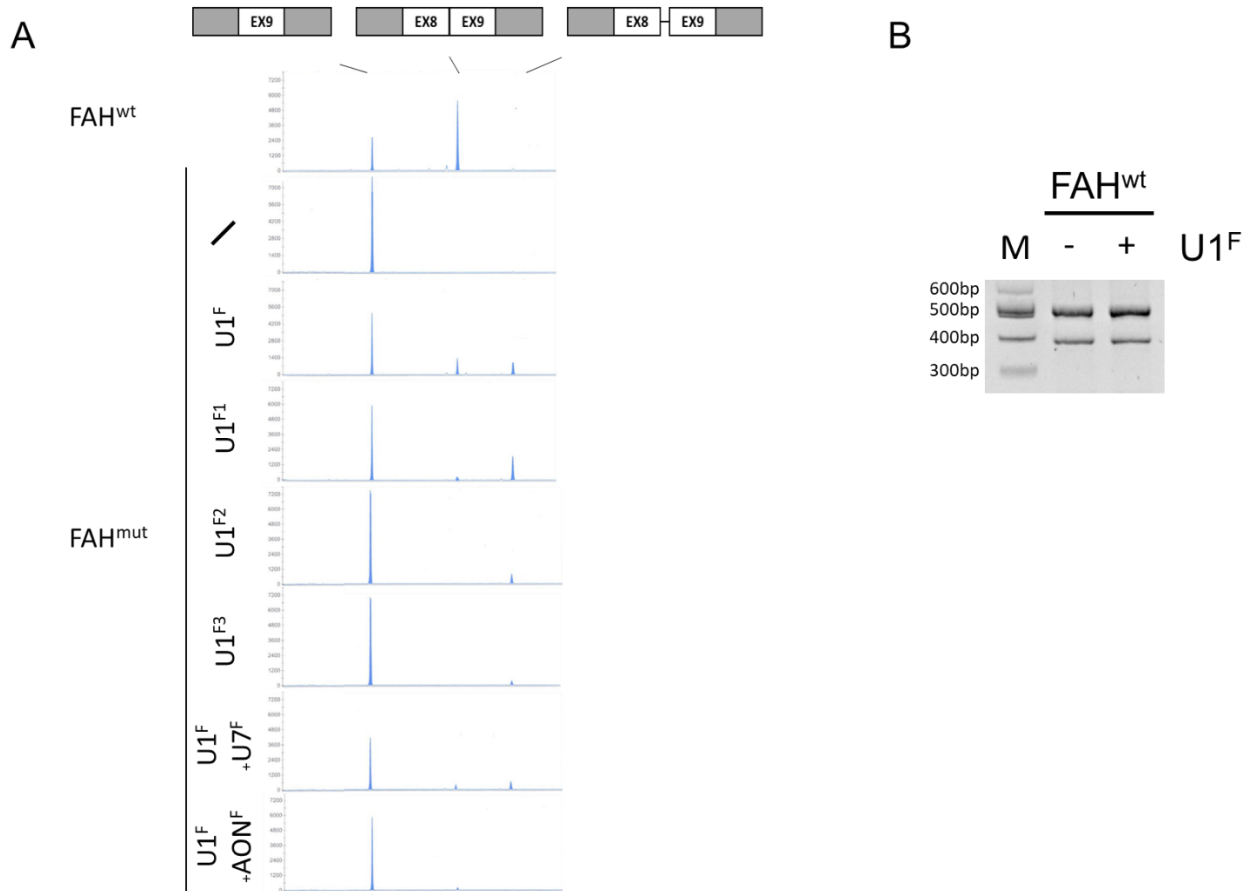

**Figure S1.** (A) Evaluation of *FAH* minigene splicing patterns by denaturing capillary electrophoresis of fluorescently-labelled PCR products. The amount of transcripts is represented by the area under each peak, and the analysis is shown in figure 1B. The scheme of transcripts is reported on top. RFU: Relative Fluorescence Units (B) *FAH* splicing patterns in Hepa1-6 cells transiently transfected with the wild-type (*FAH*<sup>wt</sup>) minigene, alone or in combination with U1<sup>F</sup>. Amplified products were separated on 2% agarose gel. M, 100 bp molecular weight marker.

Figure S2

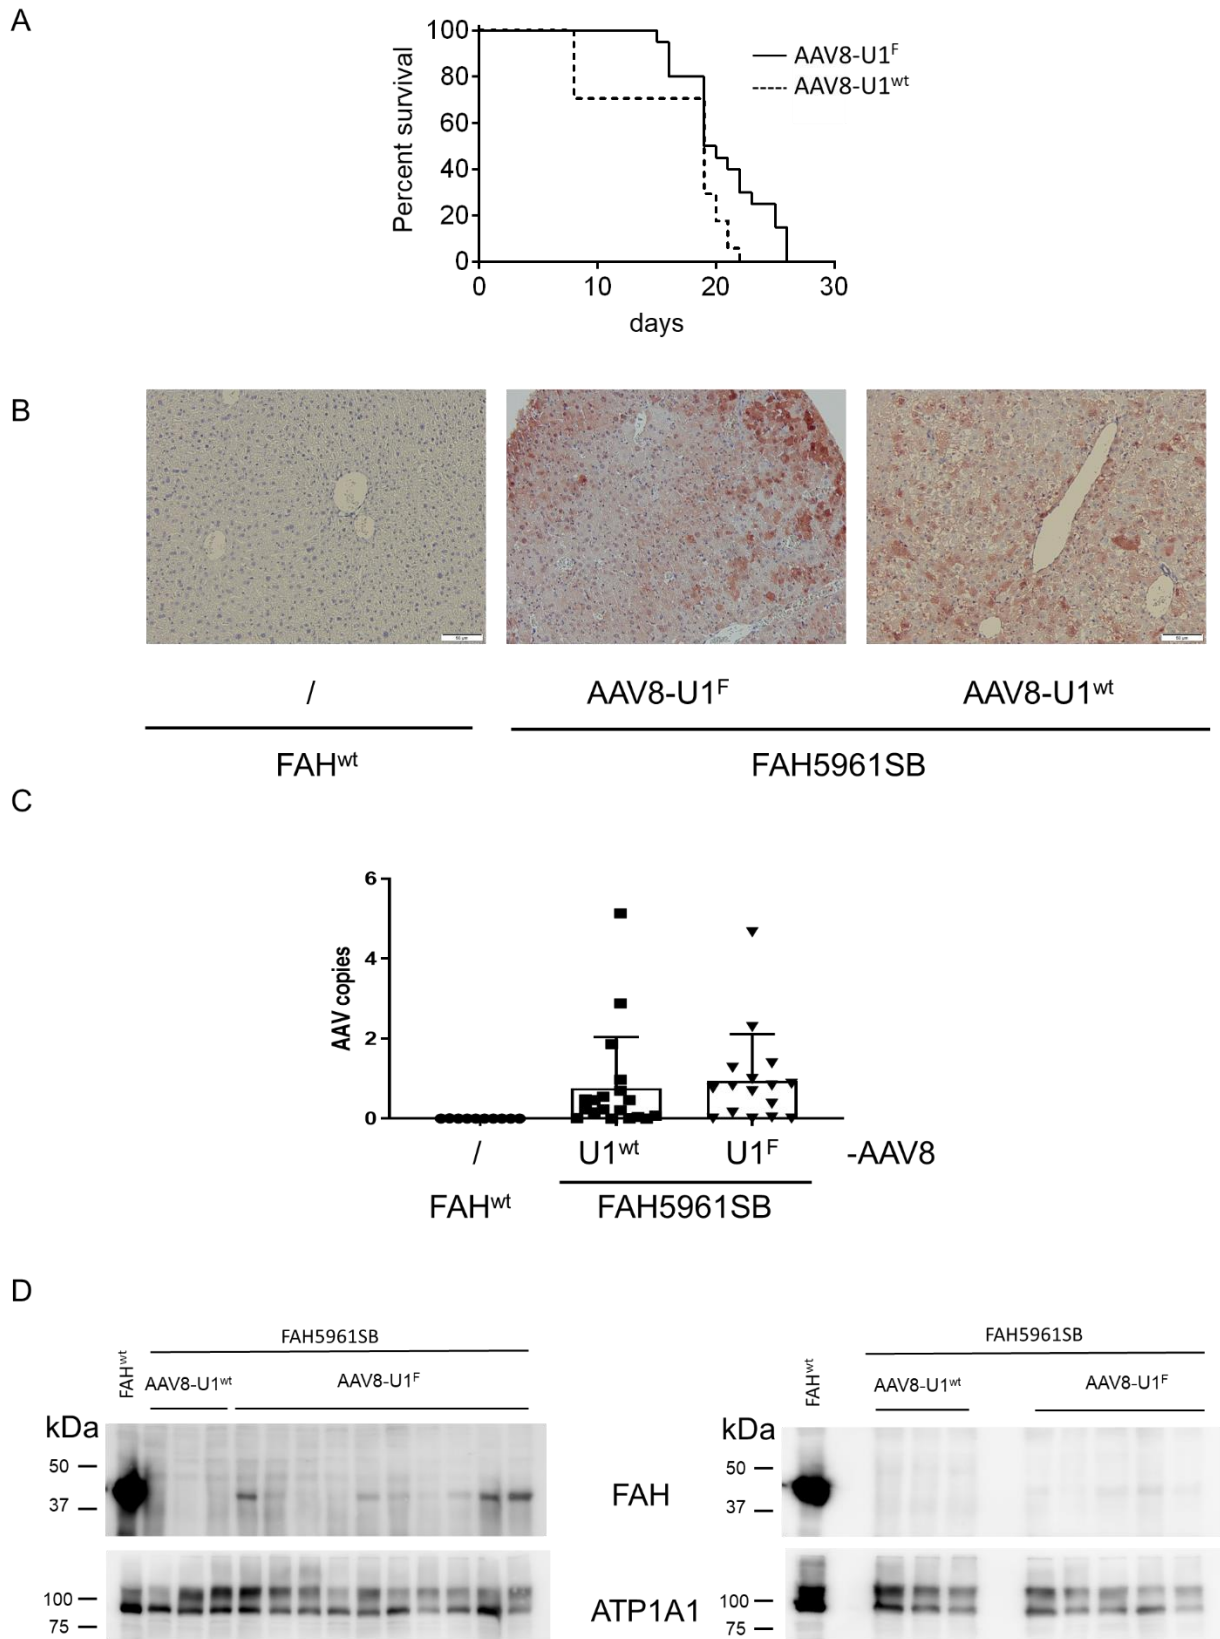

**Figure S2.** (A) Survival curve of *FAH5961SB* mice injected with the AAV8-U1<sup>wt</sup> (dotted line) or AAV8-U1<sup>F</sup> (continuous line) and kept on normal drinking water (-NTBC). The time until the mice reached the humane

endpoint is shown. **(B)** Examples of liver sections from *FAH5961SB* mice injected with the AAV8-U1<sup>wt</sup> or AAV8-U1<sup>F</sup>, upon staining with an anti-GFP antibody (brown). Images are taken at 20× magnification. Scale bar, 50 μm. **(C)** Evaluation of liver transduction efficiency by evaluation of AAV8 gene copy number. **(D)** Western blotting analysis through a specific anti-FAH antibody in liver homogenates of wild type (FAH<sup>wt</sup>) and *FAH5961SB* mice treated with AAV8-U1<sup>wt</sup> or AAV8-U1<sup>F</sup>. The mouse ATPase Na<sup>+</sup>/K<sup>+</sup> Transporting Subunit Alpha 1 (*ATP1A1*) has been exploited as load control. The protein marker, reporting the molecular size of bands, is reported on the left.

Table S1

| Oligonucleotide                                            |         | Sequence (5'→3')                           |
|------------------------------------------------------------|---------|--------------------------------------------|
| Creation of mouse <i>FAH</i> minigene                      |         |                                            |
| <b>7F</b>                                                  | forward | <u>tgaccat</u> atgaggggaagtaatgccaggt      |
| <b>9R</b>                                                  | reverse | tacgcata <u>tgctt</u> atagcctctattccaa     |
| Mutant mouse <i>FAH</i> minigene                           |         |                                            |
| <b>FAH mut F</b>                                           | forward | gaacgactggagcagtaatgcctgggtg               |
| <b>FAH mut R</b>                                           | reverse | caccaggcattactgctccagtcgttc                |
| Engineered U1snRNA variants for mouse <i>FAH</i> 5'ss      |         |                                            |
| <b>U1<sup>F</sup> F</b>                                    | forward | aggccaagatctgatCATTACTGCgcaggggagataccat   |
| <b>U1<sup>F1</sup> F</b>                                   | forward | aggccaagatctgatAGGCATTACgcaggggagataccat   |
| <b>U1<sup>F2</sup> F</b>                                   | forward | aggccaagatctgatCCAGGCATTgcaggggagataccat   |
| <b>U1<sup>F3</sup> F</b>                                   | forward | aggccaagatctgatCCACCAGGCgcaggggagataccat   |
| Engineered U7snRNA variant for mouse <i>FAH</i> 5'ss       |         |                                            |
| <b>U7F</b>                                                 | forward | acagaggcctttccgcagtcaccaaccaactcaattttggag |
| Plasmid-specific primers used to analyze splicing pattern  |         |                                            |
| <b>alfa</b>                                                | forward | caactcaagctcctaagccactgc                   |
| <b>bra</b>                                                 | reverse | taggatccgggtcaccaggaagttggttaaatca         |
| Primers used to assess in vivo splicing                    |         |                                            |
| <b>mFAHex7</b>                                             | forward | actcttagacatggagttgaaatg                   |
| <b>mFAHex9</b>                                             | reverse | gtactcccattgctggatgtct                     |
| Primers used to evaluate the correctly spliced transcripts |         |                                            |
| <b>mFAHwtex8</b>                                           | reverse | ttgctggatgtctcgtgcgc                       |
| Primers used to evaluate U1 expression                     |         |                                            |
| <b>U1<sup>wt</sup>Ex</b>                                   | forward | agatctcatacttacctg                         |
| <b>U1<sup>F</sup>Ex</b>                                    | forward | agatctgatcattactgc                         |
| <b>U1Ex</b>                                                | reverse | gaacgcagtccccactaccac                      |
| Primers used to evaluated RNAseq data                      |         |                                            |
| <b>Nnmt</b>                                                | forward | atattctgcctgggtgctgt                       |
|                                                            | reverse | gtcaaaggctcctggttctct                      |
| <b>Dio1</b>                                                | forward | gggatttcattcaaggcagca                      |
|                                                            | reverse | acgttgttcttaaagcccagc                      |
| <b>GAPDH</b>                                               | forward | cgaccactttgtcaagctcat                      |
|                                                            | reverse | ccctgttgctgtagccaaatt                      |
| Primers used to evaluate the titer of AAV vectors          |         |                                            |
| <b>eGFP</b>                                                | forward | gcggggcaagtgaccgtgtg                       |
|                                                            | reverse | tgcgaaaccagggtgctcc                        |
| Primers used to evaluate the AAV8 gene copy number         |         |                                            |
| <b>GFP</b>                                                 | forward | catggtcctgctggagttc                        |
|                                                            | reverse | gtcaggtcagcttggtcttc                       |

The *NdeI* restriction site is underlined; mutated nucleotides are in red; the replaced 9 nucleotides of 5' tail of U1snRNA variants are indicated in upper case.
